# Supplementary material for: Sample size calculation for phylogenetic case linkage
Source: PubMed Central journal article supplement (PMC8284614; doi:10.1371/journal.pcbi.1009182), 2021-07-06
Supplement: pcbi.1009182.s011.pdf [file pcbi.1009182.s011.pdf]

| $\rho=0.10$    | M=0-50       | M=50-100      | M=100-150     | M=150-200     | All sample sizes | N       |
|----------------|--------------|---------------|---------------|---------------|------------------|---------|
| FDR=0.00-0.25  | 0.2613       | 0.2172        | 0.1755        | 0.1558        | <b>0.2135</b>    | 2,269   |
| FDR=0.25-0.50  | 0.3557       | 0.2324        | 0.1736        | 0.1209        | <b>0.2751</b>    | 6,138   |
| FDR=0.50-0.75  | 0.2645       | 0.1362        | 0.0981        | 0.0717        | <b>0.2057</b>    | 11,975  |
| FDR=0.75-1.00  | 0.0236       | 0.0074        | 0.0048        | 0.0035        | <b>0.0155</b>    | 240,978 |
| All FDR Values | <b>0.044</b> | <b>0.0218</b> | <b>0.0149</b> | <b>0.0107</b> | <b>0.032</b>     | 261,360 |
| N              | 140,845      | 65,386        | 35,754        | 19,375        | 261,360          |         |

| $\rho=0.25$    | M=0-125      | M=125-250     | M=250-375     | M=375-500    | All sample sizes | N       |
|----------------|--------------|---------------|---------------|--------------|------------------|---------|
| FDR=0.00-0.25  | 0.1726       | 0.1219        | 0.0934        | 0.0742       | <b>0.1359</b>    | 4,420   |
| FDR=0.25-0.50  | 0.2089       | 0.1006        | 0.0677        | 0.0521       | <b>0.1583</b>    | 8,246   |
| FDR=0.50-0.75  | 0.1268       | 0.0551        | 0.0404        | 0.0308       | <b>0.0979</b>    | 13,013  |
| FDR=0.75-1.00  | 0.0106       | 0.0031        | 0.002         | 0.0014       | <b>0.0069</b>    | 241,560 |
| All FDR Values | <b>0.026</b> | <b>0.0106</b> | <b>0.0069</b> | <b>0.005</b> | <b>0.0181</b>    | 267,239 |
| N              | 145,662      | 64,720        | 37,176        | 19,681       | 267,239          |         |

| $\rho=0.50$    | M=0-250       | M=250-500     | M=500-750     | M=750-1000    | All sample sizes | N       |
|----------------|---------------|---------------|---------------|---------------|------------------|---------|
| FDR=0.00-0.25  | 0.1049        | 0.06          | 0.0399        | 0.0314        | <b>0.0799</b>    | 5,515   |
| FDR=0.25-0.50  | 0.1046        | 0.0442        | 0.0322        | 0.0236        | <b>0.079</b>     | 8,605   |
| FDR=0.50-0.75  | 0.0616        | 0.0279        | 0.02          | 0.0149        | <b>0.0478</b>    | 13,016  |
| FDR=0.75-1.00  | 0.0054        | 0.0017        | 0.001         | 0.0007        | <b>0.0035</b>    | 241,764 |
| All FDR Values | <b>0.0141</b> | <b>0.0054</b> | <b>0.0033</b> | <b>0.0022</b> | <b>0.0097</b>    | 268,900 |
| N              | 148,403       | 64,381        | 35,787        | 20,329        | 268,900          |         |

| $\rho=0.75$    | M=0-375       | M=375-750     | M=750-1125    | M=1125-1500   | All sample sizes | N       |
|----------------|---------------|---------------|---------------|---------------|------------------|---------|
| FDR=0.00-0.25  | 0.0506        | 0.0305        | 0.0213        | 0.018         | <b>0.0401</b>    | 5,696   |
| FDR=0.25-0.50  | 0.0541        | 0.0246        | 0.0163        | 0.0137        | <b>0.0416</b>    | 8,644   |
| FDR=0.50-0.75  | 0.0331        | 0.0147        | 0.0103        | 0.0085        | <b>0.0259</b>    | 13,065  |
| FDR=0.75-1.00  | 0.003         | 0.0009        | 0.0005        | 0.0004        | <b>0.002</b>     | 240,823 |
| All FDR Values | <b>0.0075</b> | <b>0.0028</b> | <b>0.0017</b> | <b>0.0013</b> | <b>0.0052</b>    | 268,228 |
| N              | 150,672       | 64,274        | 35,407        | 17,875        | 268,228          |         |
