# Supplementary material for: Sample size calculation for phylogenetic case linkage
Source: PubMed Central journal article supplement (PMC8284614; doi:10.1371/journal.pcbi.1009182), 2021-07-06
Supplement: pcbi.1009182.s012.pdf [file pcbi.1009182.s012.pdf]

| <b>Bias</b>    | $\rho=0.10$   | $\rho=0.25$    | $\rho=0.50$    | $\rho=0.75$    | All $\rho$ values | N         |
|----------------|---------------|----------------|----------------|----------------|-------------------|-----------|
| FDR=0.00-0.25  | -0.1105       | -0.0859        | -0.0733        | -0.0739        | <b>-0.0823</b>    | 23,704    |
| FDR=0.25-0.50  | -0.0926       | -0.0683        | -0.0631        | -0.0674        | <b>-0.0715</b>    | 35,511    |
| FDR=0.50-0.75  | -0.0426       | -0.0397        | -0.0423        | -0.0455        | <b>-0.0425</b>    | 54,096    |
| FDR=0.75-1.00  | -0.002        | -0.002         | -0.002         | -0.0023        | <b>-0.0021</b>    | 952,416   |
| All FDR Values | <b>-0.008</b> | <b>-0.0081</b> | <b>-0.0081</b> | <b>-0.0088</b> | <b>-0.0082</b>    | 1,065,727 |
| N              | 261,360       | 267,239        | 268,900        | 268,228        | 1,065,727         |           |

| <b>Error</b>   | $\rho=0.10$   | $\rho=0.25$   | $\rho=0.50$   | $\rho=0.75$   | All $\rho$ values | N         |
|----------------|---------------|---------------|---------------|---------------|-------------------|-----------|
| FDR=0.00-0.25  | 0.2551        | 0.1858        | 0.1462        | 0.1298        | <b>0.1678</b>     | 23,704    |
| FDR=0.25-0.50  | 0.2934        | 0.2059        | 0.151         | 0.1343        | <b>0.1891</b>     | 35,511    |
| FDR=0.50-0.75  | 0.2176        | 0.1395        | 0.1084        | 0.1018        | <b>0.1403</b>     | 54,096    |
| FDR=0.75-1.00  | 0.0177        | 0.0107        | 0.0084        | 0.0078        | <b>0.0112</b>     | 952,416   |
| All FDR Values | <b>0.0383</b> | <b>0.0279</b> | <b>0.0221</b> | <b>0.0205</b> | <b>0.0271</b>     | 1,065,727 |
| N              | 261,360       | 267,239       | 268,900       | 268,228       | 1,065,727         |           |
