# Supplementary material for: Sample size calculation for phylogenetic case linkage
Source: PubMed Central journal article supplement (PMC8284614; doi:10.1371/journal.pcbi.1009182), 2021-07-06
Supplement: pcbi.1009182.s013.pdf [file pcbi.1009182.s013.pdf]

| $\rho=0.10$    | M=0-50        | M=50-100      | M=100-150     | M=150-200     | All sample sizes | N       |
|----------------|---------------|---------------|---------------|---------------|------------------|---------|
| FDR=0.00-0.25  | 0.3264        | 0.2308        | 0.1735        | 0.1489        | <b>0.2551</b>    | 3,670   |
| FDR=0.25-0.50  | 0.3627        | 0.2473        | 0.1812        | 0.1542        | <b>0.2934</b>    | 7,085   |
| FDR=0.50-0.75  | 0.2674        | 0.1597        | 0.1221        | 0.1085        | <b>0.2176</b>    | 12,728  |
| FDR=0.75-1.00  | 0.0257        | 0.01          | 0.0069        | 0.0061        | <b>0.0177</b>    | 237,877 |
| All FDR Values | <b>0.0509</b> | <b>0.0288</b> | <b>0.0186</b> | <b>0.0146</b> | <b>0.0383</b>    | 261,360 |
| N              | 140,845       | 65,386        | 35,754        | 19,375        | 261,360          |         |

| $\rho=0.25$    | M=0-125       | M=125-250     | M=250-375     | M=375-500     | All sample sizes | N       |
|----------------|---------------|---------------|---------------|---------------|------------------|---------|
| FDR=0.00-0.25  | 0.2356        | 0.1566        | 0.1079        | 0.0941        | <b>0.1858</b>    | 5,859   |
| FDR=0.25-0.50  | 0.2509        | 0.1552        | 0.1127        | 0.0958        | <b>0.2059</b>    | 9,231   |
| FDR=0.50-0.75  | 0.1619        | 0.1134        | 0.0846        | 0.0844        | <b>0.1395</b>    | 13,727  |
| FDR=0.75-1.00  | 0.0144        | 0.0076        | 0.0052        | 0.0053        | <b>0.0107</b>    | 238,422 |
| All FDR Values | <b>0.0367</b> | <b>0.0216</b> | <b>0.0134</b> | <b>0.0115</b> | <b>0.0279</b>    | 267,239 |
| N              | 145,662       | 64,720        | 37,176        | 19,681        | 267,239          |         |

| $\rho=0.50$    | M=0-250       | M=250-500     | M=500-750     | M=750-1000    | All sample sizes | N       |
|----------------|---------------|---------------|---------------|---------------|------------------|---------|
| FDR=0.00-0.25  | 0.1858        | 0.1076        | 0.0783        | 0.0647        | <b>0.1462</b>    | 6,901   |
| FDR=0.25-0.50  | 0.1756        | 0.1207        | 0.094         | 0.0849        | <b>0.151</b>     | 9,522   |
| FDR=0.50-0.75  | 0.1194        | 0.096         | 0.0793        | 0.0799        | <b>0.1084</b>    | 13,831  |
| FDR=0.75-1.00  | 0.0106        | 0.0066        | 0.0051        | 0.0048        | <b>0.0084</b>    | 238,646 |
| All FDR Values | <b>0.0283</b> | <b>0.0175</b> | <b>0.0119</b> | <b>0.0099</b> | <b>0.0221</b>    | 268,900 |
| N              | 148,403       | 64,381        | 35,787        | 20,329        | 268,900          |         |

| $\rho=0.75$    | M=0-375       | M=375-750     | M=750-1125    | M=1125-1500   | All sample sizes | N       |
|----------------|---------------|---------------|---------------|---------------|------------------|---------|
| FDR=0.00-0.25  | 0.1624        | 0.0966        | 0.0645        | 0.0472        | <b>0.1298</b>    | 7,274   |
| FDR=0.25-0.50  | 0.1517        | 0.1158        | 0.0875        | 0.0762        | <b>0.1343</b>    | 9,673   |
| FDR=0.50-0.75  | 0.1095        | 0.0957        | 0.0759        | 0.0752        | <b>0.1018</b>    | 13,810  |
| FDR=0.75-1.00  | 0.0094        | 0.0066        | 0.005         | 0.0046        | <b>0.0078</b>    | 237,471 |
| All FDR Values | <b>0.0255</b> | <b>0.0169</b> | <b>0.0113</b> | <b>0.0092</b> | <b>0.0205</b>    | 268,228 |
| N              | 150,672       | 64,274        | 35,407        | 17,875        | 268,228          |         |
