# Supplementary material for: Sample size calculation for phylogenetic case linkage
Source: PubMed Central journal article supplement (PMC8284614; doi:10.1371/journal.pcbi.1009182), 2021-07-06
Supplement: pcbi.1009182.s014.pdf [file pcbi.1009182.s014.pdf]

| <b>Bias</b>    | $\rho=0.10$  | $\rho=0.25$   | $\rho=0.50$   | $\rho=0.75$   | All $\rho$ values | N         |
|----------------|--------------|---------------|---------------|---------------|-------------------|-----------|
| FDR=0.00-0.25  | 0.0062       | 0.0146        | 0.013         | 0.0211        | <b>0.0151</b>     | 15,868    |
| FDR=0.25-0.50  | 0.009        | 0.0135        | 0.0167        | 0.0167        | <b>0.0144</b>     | 31,770    |
| FDR=0.50-0.75  | 0.0153       | 0.0157        | 0.0125        | 0.0132        | <b>0.0141</b>     | 50,302    |
| FDR=0.75-1.00  | 0.0011       | 0.0011        | 0.001         | 0.0011        | <b>0.0011</b>     | 967,787   |
| All FDR Values | <b>0.002</b> | <b>0.0024</b> | <b>0.0023</b> | <b>0.0025</b> | <b>0.0023</b>     | 1,065,727 |
| N              | 261,360      | 267,239       | 268,900       | 268,228       | 1,065,727         |           |

| <b>Error</b>   | $\rho=0.10$   | $\rho=0.25$   | $\rho=0.50$   | $\rho=0.75$   | All $\rho$ values | N         |
|----------------|---------------|---------------|---------------|---------------|-------------------|-----------|
| FDR=0.00-0.25  | 0.2192        | 0.1494        | 0.1071        | 0.0792        | <b>0.1233</b>     | 15,868    |
| FDR=0.25-0.50  | 0.2766        | 0.1711        | 0.1006        | 0.075         | <b>0.1448</b>     | 31,770    |
| FDR=0.50-0.75  | 0.2131        | 0.1121        | 0.0694        | 0.0569        | <b>0.1104</b>     | 50,302    |
| FDR=0.75-1.00  | 0.0168        | 0.0086        | 0.0059        | 0.005         | <b>0.0091</b>     | 967,787   |
| All FDR Values | <b>0.0331</b> | <b>0.0207</b> | <b>0.0138</b> | <b>0.0112</b> | <b>0.0196</b>     | 1,065,727 |
| N              | 261,360       | 267,239       | 268,900       | 268,228       | 1,065,727         |           |
